# Supplementary material
Source: PubMed Central journal article supplement (PMC9386970)
Supplement: 12917_2022_3419_MOESM1_ESM.pdf [file 12917_2022_3419_MOESM1_ESM.pdf]

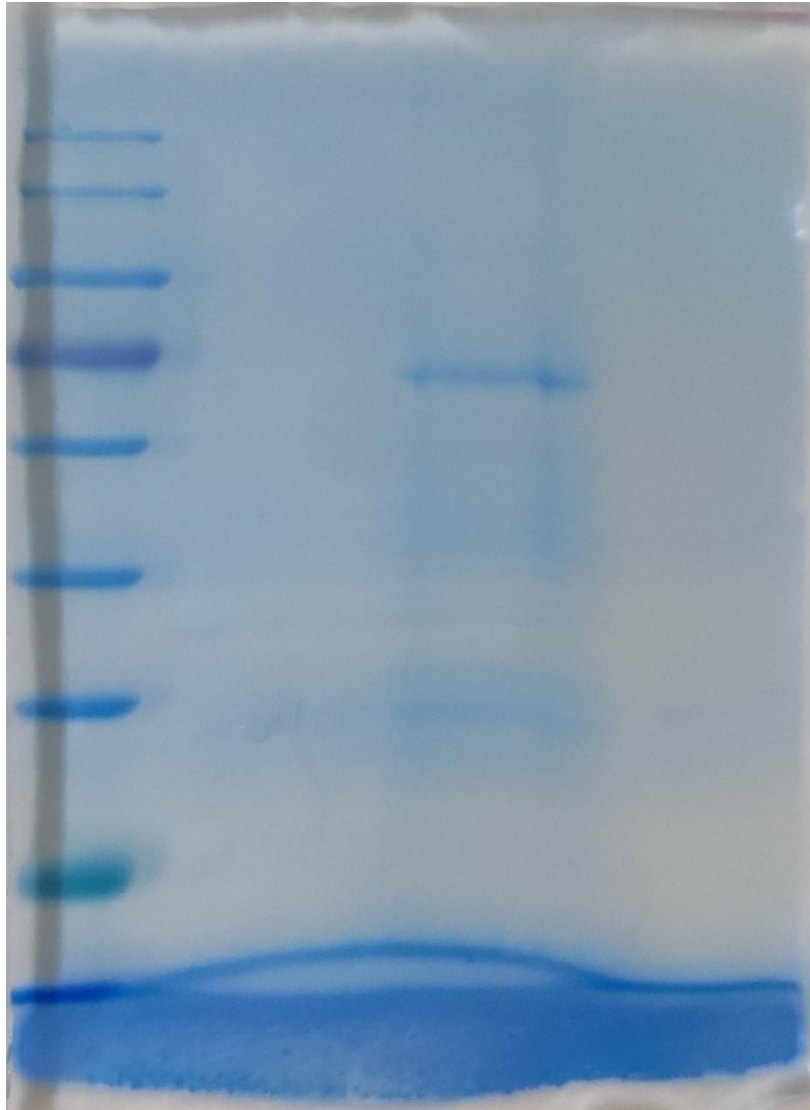

The raw image of Figure 2B
